# Supplementary material
Source: Copernicus journal article supplement (doi:10.5194/acp-26-8295-2026)
Supplement: Supplementary file 1 [file acp-26-8295-2026-supplement.pdf]

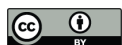

*Supplement of*

## **Measurement report: Ice nucleating particles variability across a megacity**

**Sebastián Mendoza-Téllez et al.**

*Correspondence to:* Sebastián Mendoza-Téllez ([sebastian.mendoza@atmosfera.unam.mx](mailto:sebastian.mendoza@atmosfera.unam.mx)) and Luis A. Ladino ([luis.ladino@atmosfera.unam.mx](mailto:luis.ladino@atmosfera.unam.mx))

The copyright of individual parts of the supplement might differ from the article licence.

Table S1. Meteorological parameters for the campaign dates at the southern sampling site (CU).

| Date (May, 2022) | Average Temperature (°C) | Relative Humidity (%) | Average Pressure (mb) | Total rain (mm) | Average Radiation (W/m <sup>2</sup> ) | Average UV Index |
|------------------|--------------------------|-----------------------|-----------------------|-----------------|---------------------------------------|------------------|
| 12               | 18.7                     | 50.2                  | 778.5                 | 0.0             | 175.3                                 | 0.9              |
| 13               | 20.4                     | 42.3                  | 777.0                 | 0.0             | 182.5                                 | 0.8              |
| 14               | 20.3                     | 32.1                  | 777.2                 | 0.0             | 166.8                                 | 0.8              |
| 15               | 20.5                     | 32.1                  | 778.0                 | 0.0             | 172.6                                 | 0.8              |
| 16               | 19.0                     | 34.1                  | 778.9                 | 0.0             | 161.7                                 | 0.7              |
| 17               | 21.9                     | 30.8                  | 779.2                 | 0.0             | 323.3                                 | 1.8              |
| 18               | 21.5                     | 31.7                  | 778.4                 | 0.0             | 190.1                                 | 0.7              |
| 19               | 21.9                     | 38.6                  | 776.5                 | 0.0             | 191.6                                 | 0.7              |
| 20               | 22.2                     | 41.3                  | 775.2                 | 0.0             | 149.6                                 | 0.5              |
| <b>Average</b>   | <b>20.7</b>              | <b>37.0</b>           | <b>777.7</b>          | <b>0.0</b>      | <b>190.4</b>                          | <b>0.9</b>       |

Table S2. Meteorological parameters for the campaign dates at the northern sampling site (C5).

| Date (May, 2022) | Average Temperature (°C) | Relative Humidity (%) | Average Pressure (mb) | Total rain (mm) | Average Radiation (W/m <sup>2</sup> ) | Average UV Index |
|------------------|--------------------------|-----------------------|-----------------------|-----------------|---------------------------------------|------------------|
| 12               | 19.9                     | 51.8                  | 781.8                 | 0.0             | 320.3                                 | 1.8              |
| 13               | 21.3                     | 45.1                  | 780.5                 | 0.0             | 296.0                                 | 1.6              |
| 14               | 21.9                     | 37.1                  | 780.6                 | 0.0             | 306.4                                 | 1.7              |
| 15               | 21.5                     | 35.6                  | 781.5                 | 0.0             | 302.4                                 | 1.7              |
| 16               | 21.1                     | 35.0                  | 782.2                 | 0.0             | 301.9                                 | 1.6              |
| 17               | 21.7                     | 37.8                  | 782.7                 | 0.0             | 296.5                                 | 1.5              |
| 18               | 22.7                     | 36.6                  | 781.9                 | 0.0             | 308.4                                 | 1.5              |
| 19               | 23.6                     | 40.1                  | 779.8                 | 0.0             | 300.3                                 | 1.5              |
| 20               | 23.7                     | 43.3                  | 778.7                 | 0.0             | 266.2                                 | 1.4              |
| <b>Average</b>   | <b>21.9</b>              | <b>40.3</b>           | <b>781.1</b>          | <b>0.0</b>      | <b>299.8</b>                          | <b>1.6</b>       |

Table S3. Pearson correlation coefficients of oxidized species at the northern site (C5).

| North (C5)         | $\text{NH}_4^+$ | $\text{NO}_3^-$ | $\text{SO}_4^{2-}$ |
|--------------------|-----------------|-----------------|--------------------|
| $\text{NH}_4^+$    | 1               | 0.856           | 0.976              |
| $\text{NO}_3^-$    |                 | 1               | 0.838              |
| $\text{SO}_4^{2-}$ |                 |                 | 1                  |

Table S4. Pearson correlation coefficients of oxidized species at the southern site (CU).

| South (CU)         | $\text{NH}_4^+$ | $\text{NO}_3^-$ | $\text{SO}_4^{2-}$ |
|--------------------|-----------------|-----------------|--------------------|
| $\text{NH}_4^+$    | 1               | 0.574           | 0.975              |
| $\text{NO}_3^-$    |                 | 1               | 0.543              |
| $\text{SO}_4^{2-}$ |                 |                 | 1                  |

Table S5. Airborne bacteria isolated at the northern (C5) and southern (CU) sites. Green and red colors indicate the presence of species at both or only at one sampling site, respectively.

<sup>1</sup>Onset ice nucleate temperature ranges reported in literature, asterisk indicate temperature ranges based on genera or different species from same genera.

| <b>Species</b>                            | <b>CU</b> | <b>C5</b> | <b>Gram</b> | <b>T<sub>0</sub> range (°C)<sup>1</sup></b> |
|-------------------------------------------|-----------|-----------|-------------|---------------------------------------------|
| <i>Acinetobacter schindleri</i>           |           |           | Negative    | -24.8 ± 2.5 (Melchum et al., 2023)*         |
| <i>Arthrobacter gandavensis</i>           |           |           | Positive    | Unknown                                     |
| <i>Bacillus cereus</i>                    |           |           | Positive    | -6.8 to -18.9 (Mortazavi et al., 2015)*     |
| <i>Bacillus licheniformis</i>             |           |           | Positive    | -6.8 to -18.9 (Mortazavi et al., 2015)*     |
| <i>Bacillus megaterium</i>                |           |           | Positive    | -17.7 ± 7.9 (Melchum et al., 2023)          |
| <i>Bacillus simplex</i>                   |           |           | Positive    | -6.8 to -18.9 (Mortazavi et al., 2015)*     |
| <i>Bacillus subtilis</i>                  |           |           | Positive    | -7 to -9 °C (Failor et al., 2017)           |
| <i>Exiguobacterium aurantiacum</i>        |           |           | Positive    | Unknown                                     |
| <i>Kocuria rosea</i>                      |           |           | Positive    | -20.0 ± 1.5 (Mortazavi et al., 2015)*       |
| <i>Microbacterium aerolatum</i>           |           |           | Positive    | -21.6 ± 1 (Mortazavi et al., 2015)*         |
| <i>Microbacterium paraoxydans</i>         |           |           | Positive    | -21.6 ± 1 (Mortazavi et al., 2015)*         |
| <i>Paenarthrobacter ilicis</i>            |           |           | Positive    | Unknown                                     |
| <i>Pantoea agglomerans</i>                |           |           | Negative    | -21.2 ± 5.2 (Melchum et al., 2023)*         |
| <i>Pantoea vagans</i>                     |           |           | Negative    | -21.2 ± 5.2 (Melchum et al., 2023)*         |
| <i>Pseudarthrobacter chlorophenolicus</i> |           |           | Positive    | Unknown                                     |
| <i>Pseudarthrobacter oxydans</i>          |           |           | Positive    | Unknown                                     |
| <i>Pseudomonas antarctica</i>             |           |           | Negative    | -3.7 to -15.7 (Obata et al., 1999)          |
| <i>Pseudomonas flavescens</i>             |           |           | Negative    | -21.6 ± 5.1 (Melchum et al., 2023)*         |
| <i>Pseudomonas xanthomarina</i>           |           |           | Negative    | -21.6 ± 5.1 (Melchum et al., 2023)*         |
| <i>Pseudescherichia vulneris</i>          |           |           | Negative    | Unknown                                     |
| <i>Staphylococcus xylosus</i>             |           |           | Positive    | -22.3 to -25.4 (Melchum et al., 2023)*      |

Table S6. Airborne fungi isolated at the northern (C5) and southern (CU) sites. Green and red colors indicate the presence of genera at both or only at one sampling site, respectively. <sup>1</sup>Onset ice nucleate temperature ranges reported in literature.

| <b>Genera</b>        | <b>CU</b> | <b>C5</b> | <b>T<sub>0</sub> range (°C)<sup>1</sup></b>    |
|----------------------|-----------|-----------|------------------------------------------------|
| <i>Alternaria</i>    |           |           | -23.1 ± 2.6 (Melchum et al., 2023)             |
| <i>Aspergillus</i>   |           |           | -29.0 ± 1.9 (Melchum et al., 2023)             |
| <i>Aureobasidium</i> |           |           | Unknown                                        |
| <i>Cladosporium</i>  |           |           | -15 °C to -21.8 (Jayaweera and Flanagan, 1982) |
| <i>Epicoccum</i>     |           |           | Unknown                                        |
| <i>Fusarium</i>      |           |           | -3.5 to -11.2 (Kunert et al., 2019)            |
| <i>Penicillium</i>   |           |           |                                                |
| <i>Rhizopus</i>      |           |           | Unknown                                        |

Table S7. Pearson correlation coefficients of bacteria genera concentration between the northern (C5) and southern (CU) sites.

|                     |                       |                               |                          |                      |                            |                                    |                               |
|---------------------|-----------------------|-------------------------------|--------------------------|----------------------|----------------------------|------------------------------------|-------------------------------|
|                     | <i>Pantoea vagans</i> | <i>Pseudomonas flavescens</i> | <i>Bacillus subtilis</i> | <i>Kocuria rosea</i> | <i>Pantoea agglomerans</i> | <i>Exiguobacterium aurantiacum</i> | <i>Bacillus licheniformis</i> |
| Pearson coefficient | 0.50                  | 0.01                          | 0.12                     | 0.68                 | 0.52                       | 0.33                               | 0.23                          |

Table S8. Pearson correlation coefficients of fungi genera concentration between the northern (C5) and southern (CU) sites.

|                     |                     |                    |                    |                   |                 |
|---------------------|---------------------|--------------------|--------------------|-------------------|-----------------|
|                     | <i>Cladosporium</i> | <i>Aspergillus</i> | <i>Penicillium</i> | <i>Alternaria</i> | <i>Rhizopus</i> |
| Pearson coefficient | 0.77                | 0.41               | 0.15               | 0.17              | 0.09            |

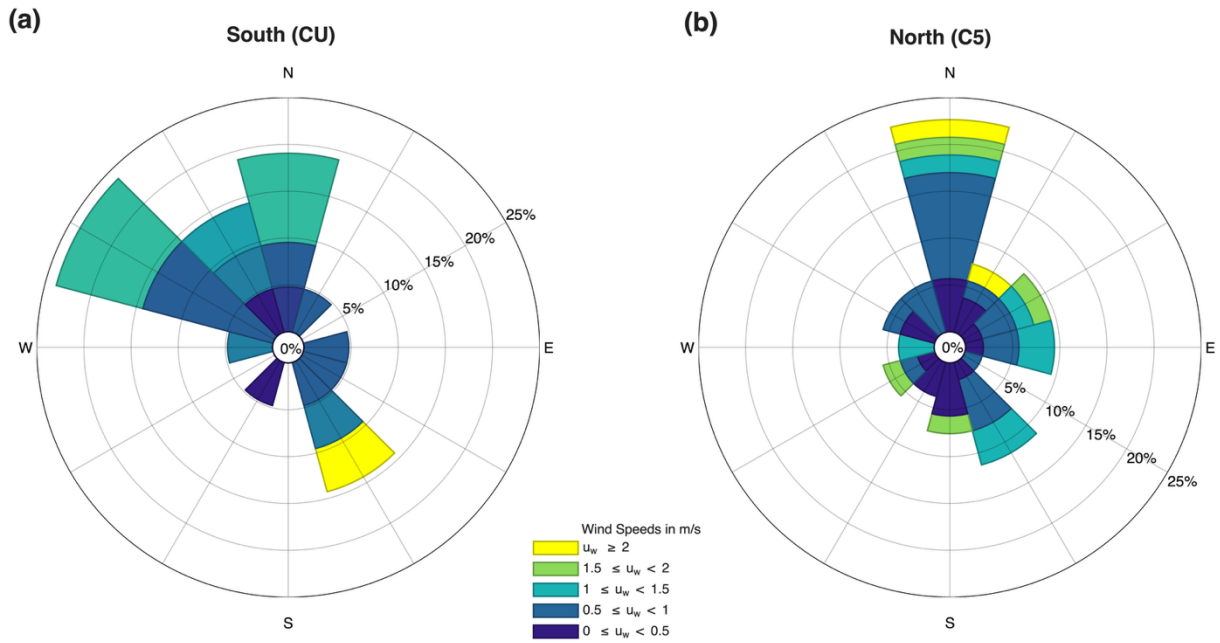

Figure S1. Windrose for ice nucleation sampling periods (May 16<sup>th</sup> to May 20<sup>th</sup>, 08:00 h to 13:00 h local time) for (a) the southern sampling site (CU) and (b) the northern sampling site (C5).

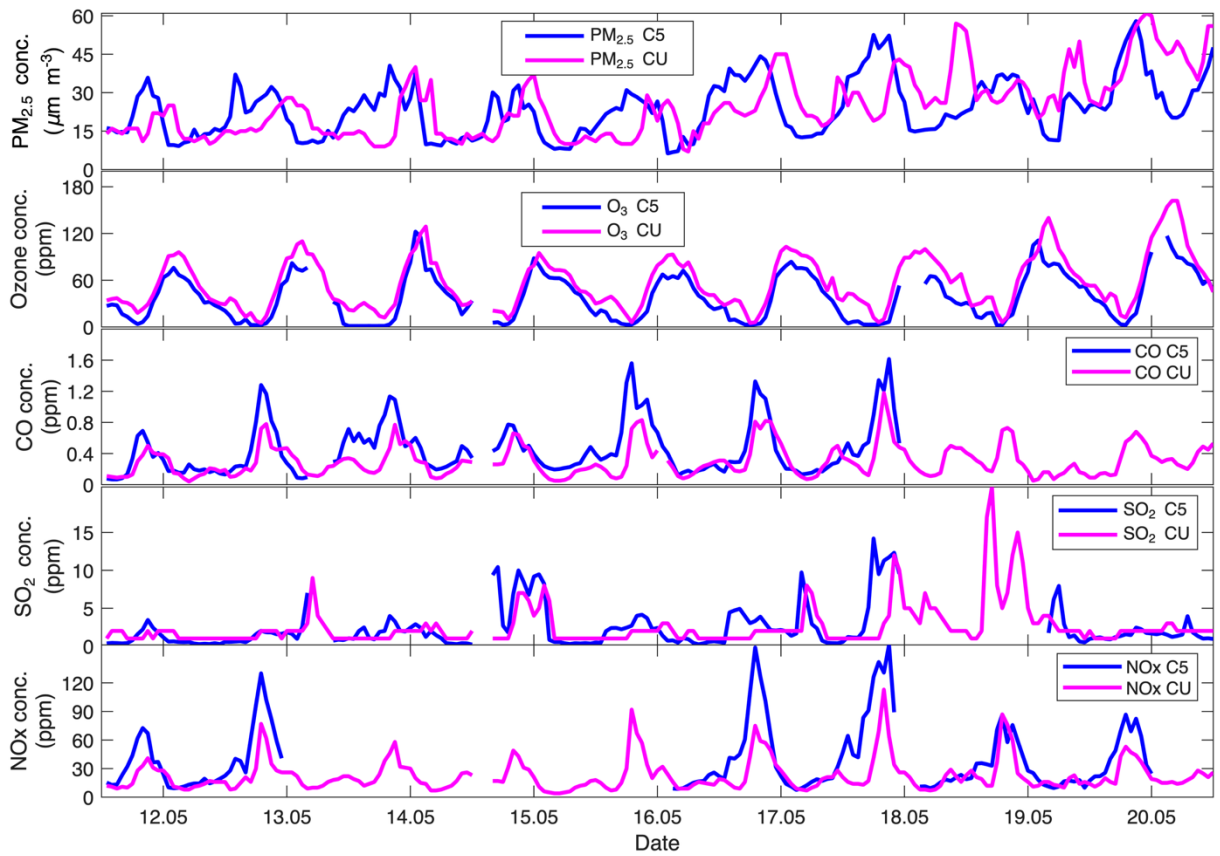

Figure S2. Criteria pollutants concentration time series for the northern (C5, blue) and southern (CU, magenta) sampling sites.

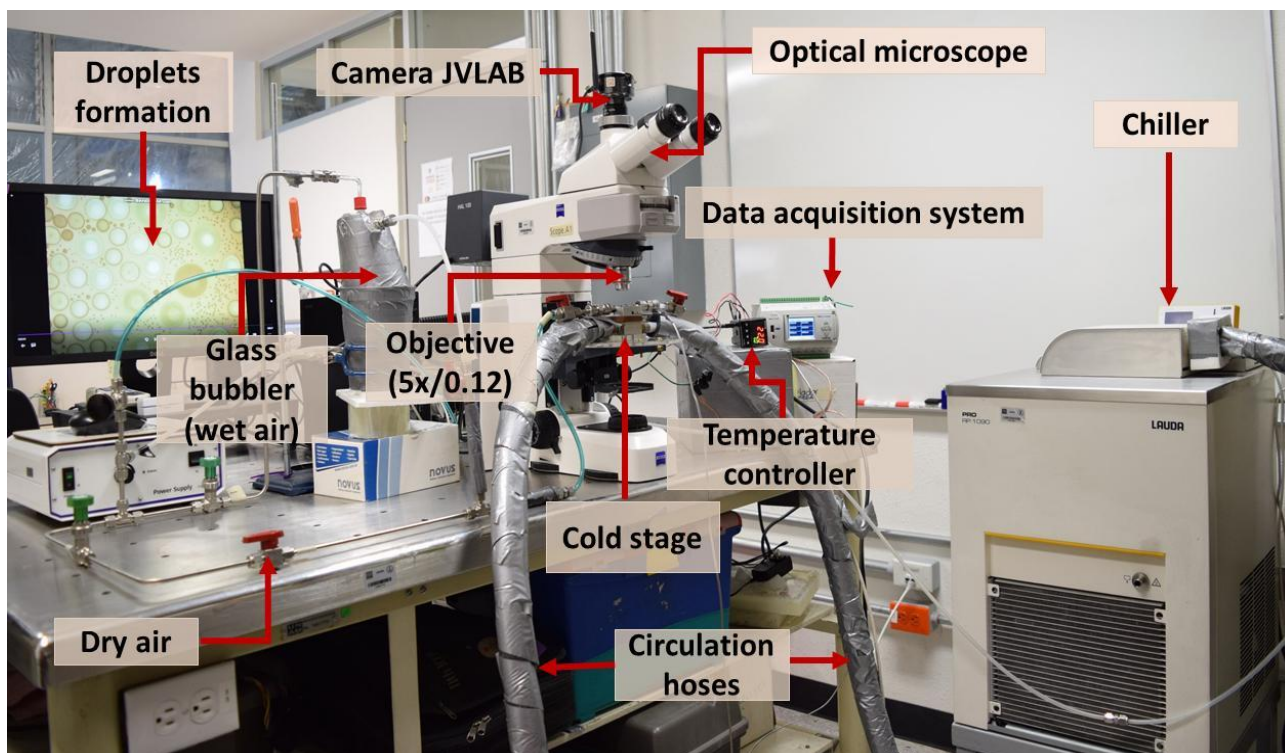

Figure S3. The UNAM-MOUDI-DFT experimental setup with its main components. Reprint of Fig. 3 from Córdoba et al. (2021).

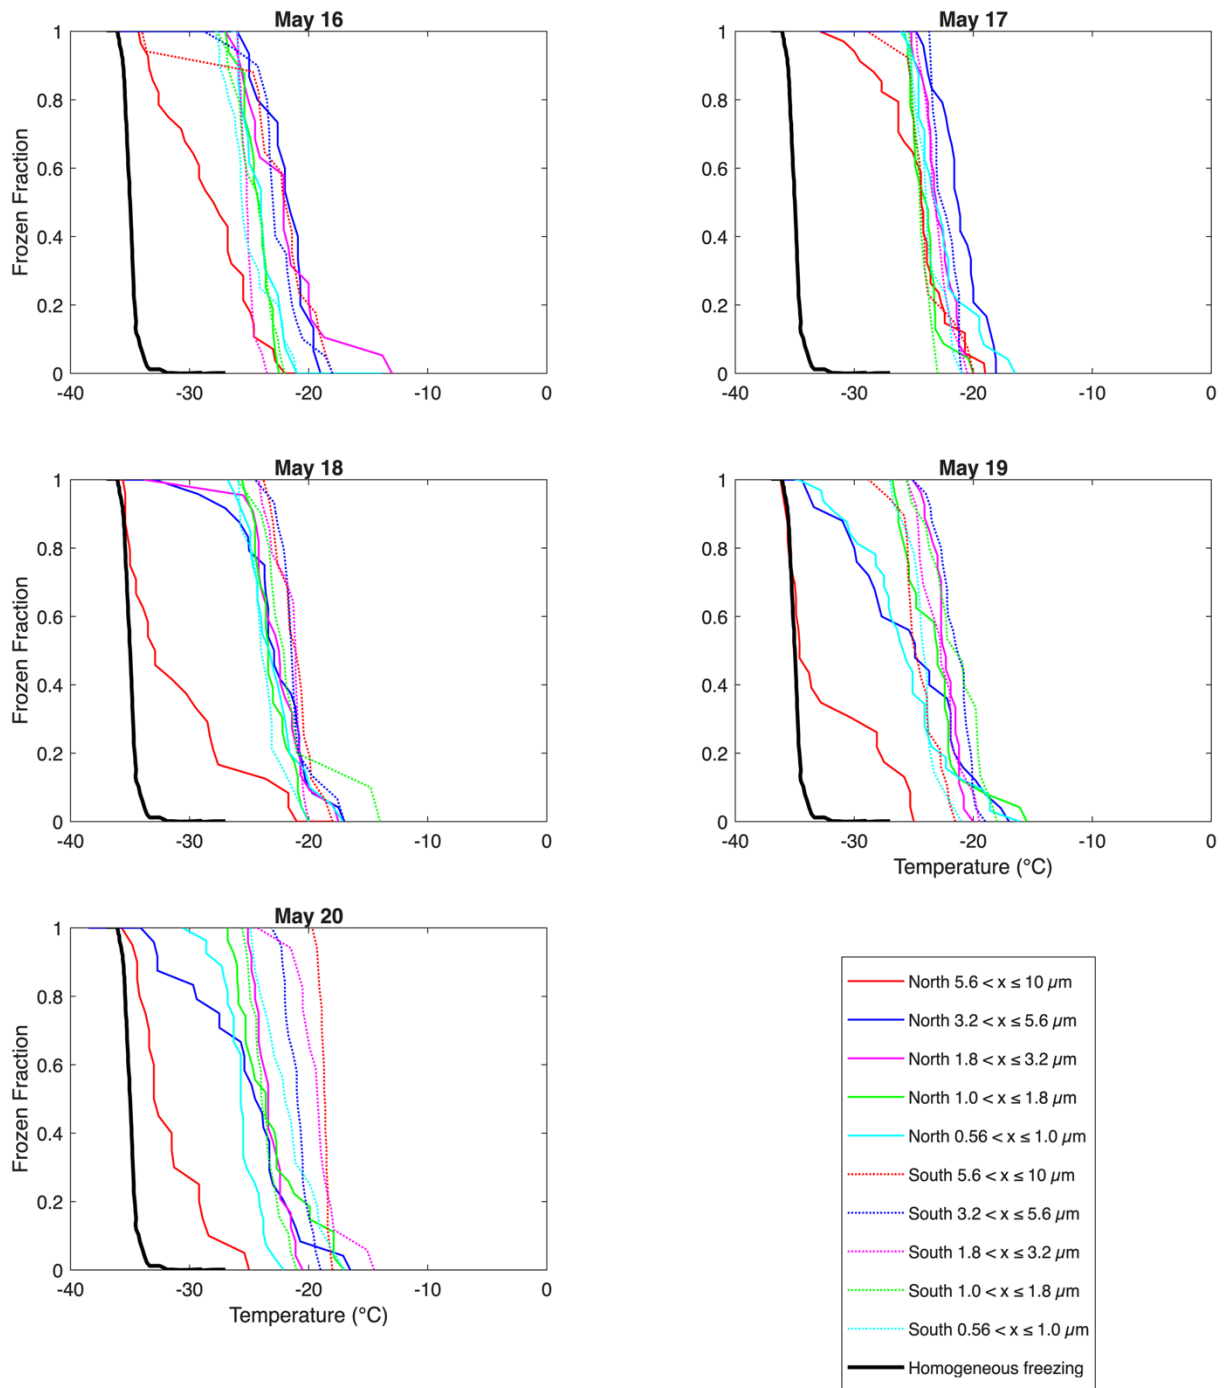

Figure S4. May 16<sup>th</sup>, 17<sup>th</sup>, 18<sup>th</sup>, 19<sup>th</sup> and 20<sup>th</sup> frozen fraction curves as a function of temperature for the northern (solid lines) and southern (dotted lines) samples (with aerodynamic diameters between 1.0 μm and 10 μm). The black line shows the average homogeneous freezing curve.

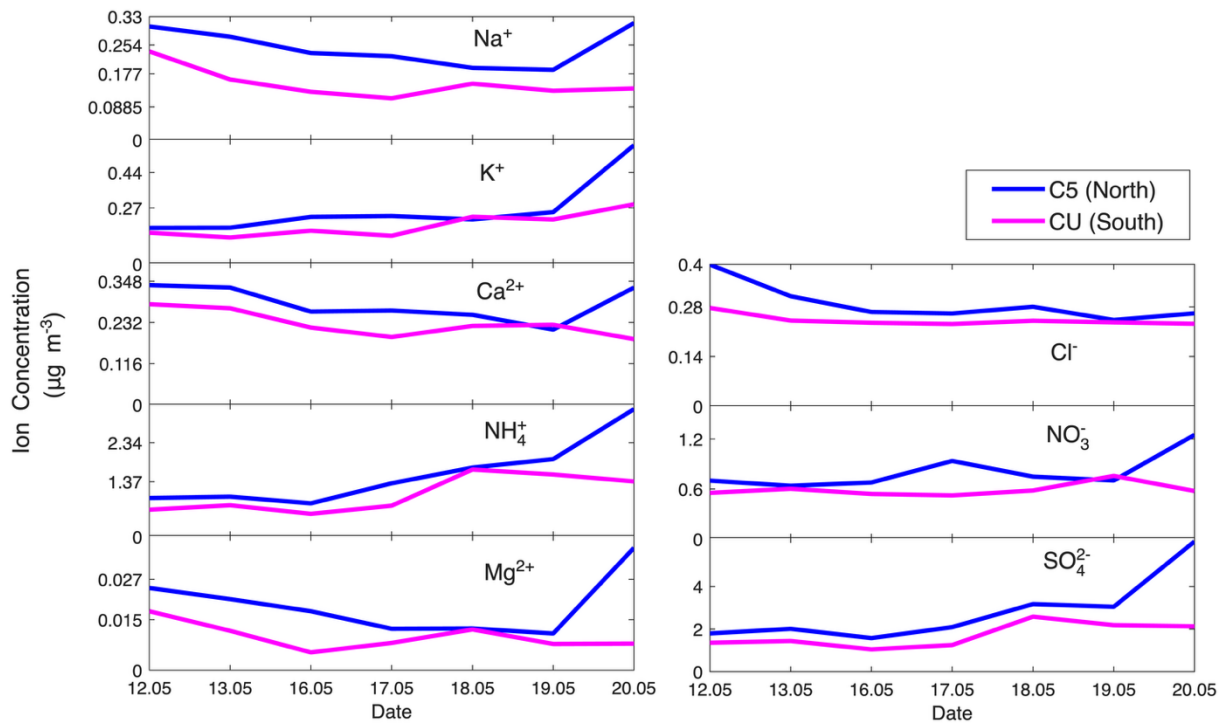

Figure S5. Time series of the cations (left) and anions (right) concentrations measured in the northern (C5, blue) and southern (CU, magenta) sites.

### HYSPLIT Backward Trajectories at 250 m AGL

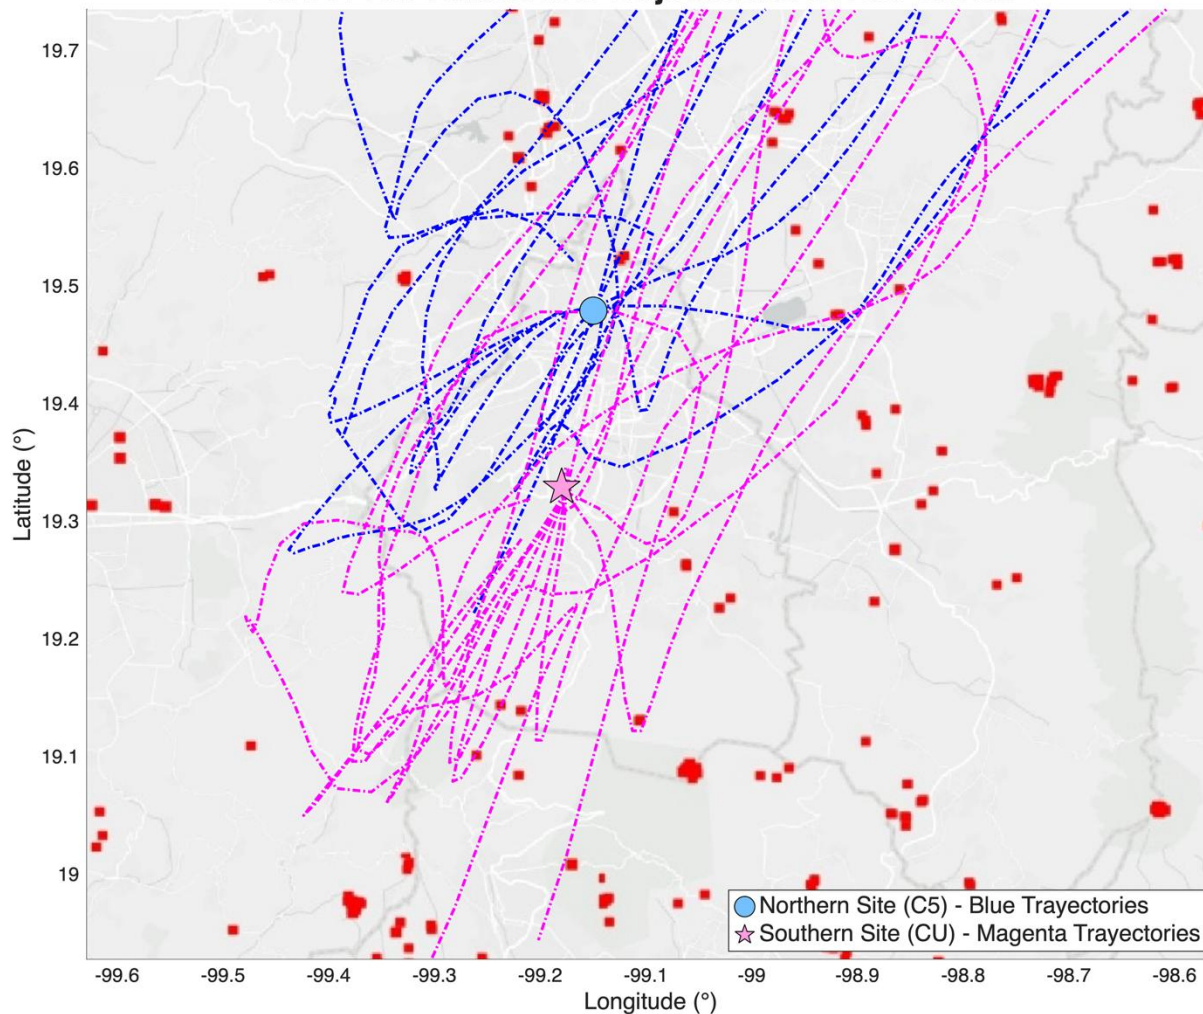

Figure S6. HYSPLIT backward trajectories at 250 m AGL at both MCMA sites overlaid in NASA FIRMS real-time active fire locations for May 12<sup>th</sup> to 20<sup>th</sup>. South (CU, blue circle) and north (C5, magenta star) MCMA sample site's locations marked at image.

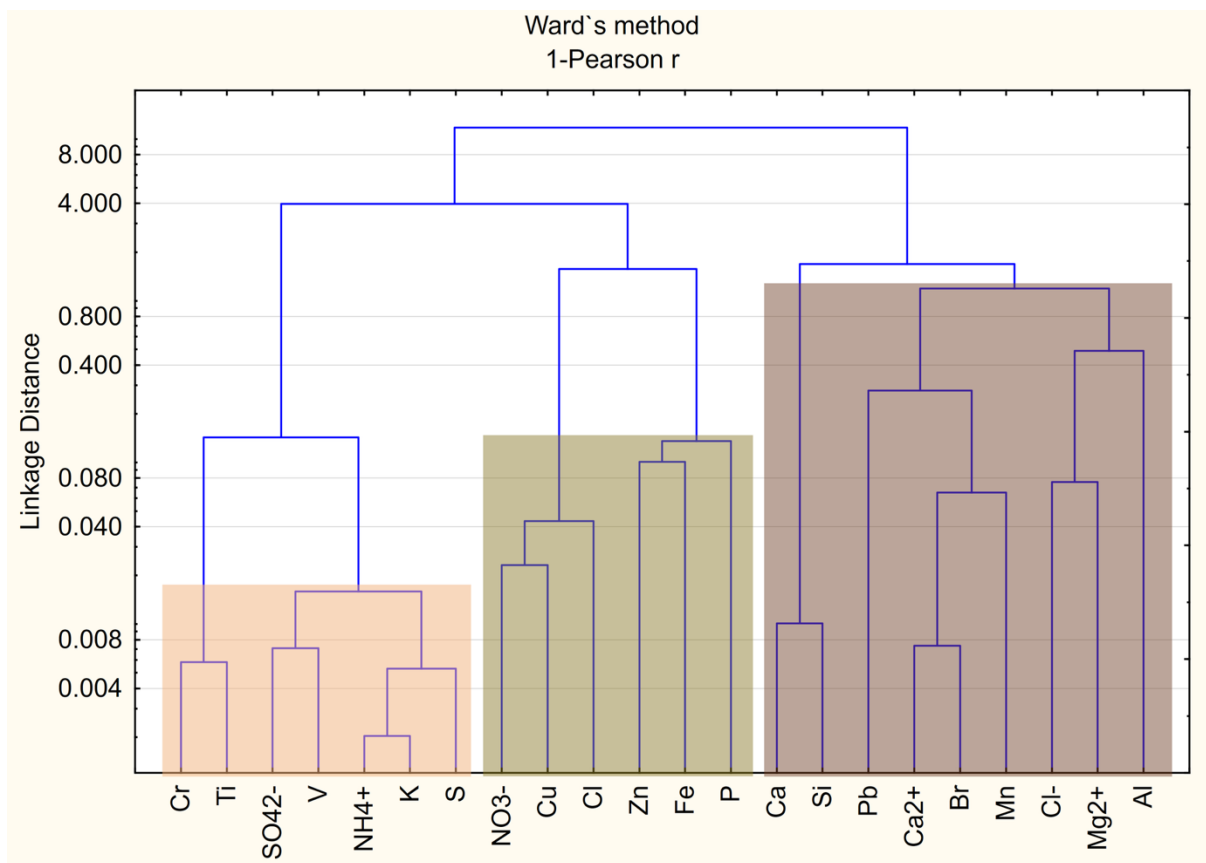

Figure S7. Dendrogram obtained using Ward's method based on Pearson correlation coefficients of every chemical species analyzed in the southern site (CU).

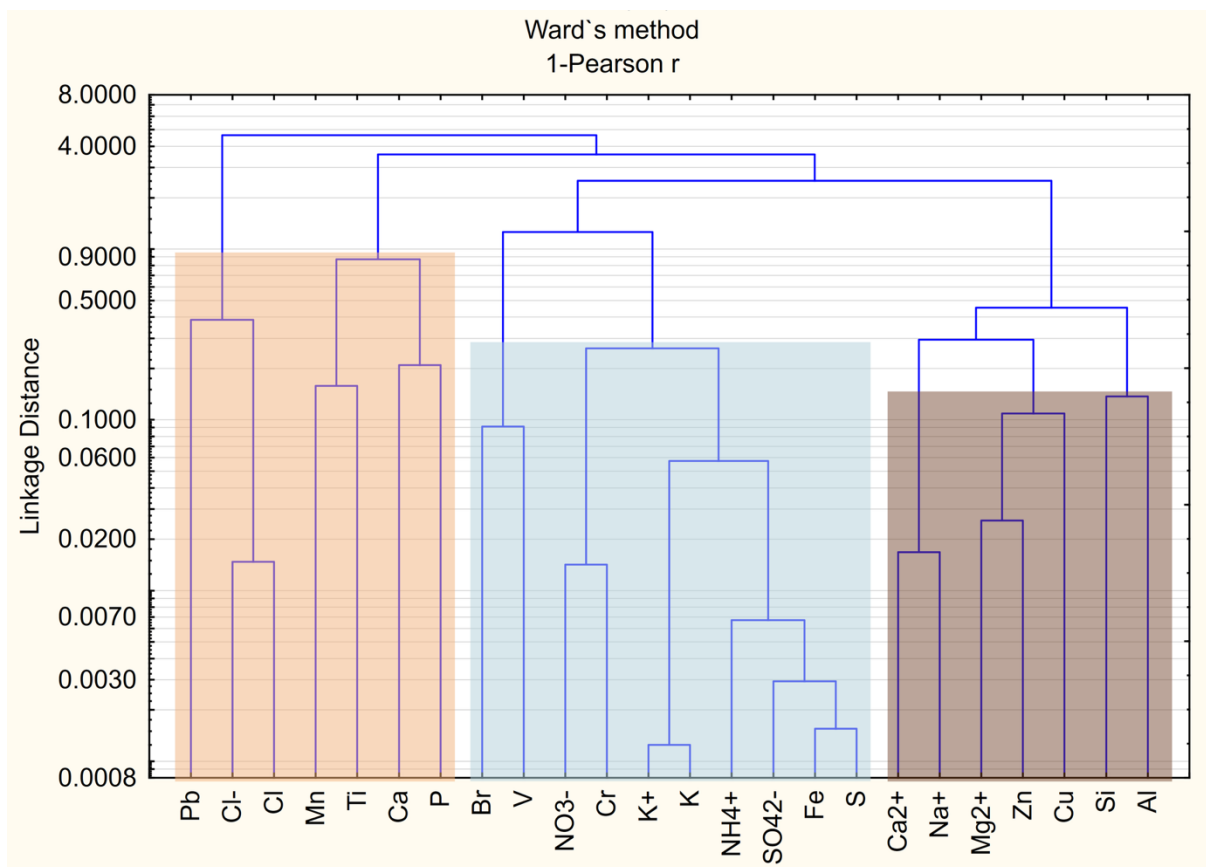

Figure S8. Dendrogram obtained using Ward's method based on Pearson correlation coefficients of every chemical species analyzed in the northern site (C5).

## References for Supplementary Information Section:

Failor, K. C., Schmale, D. G., Vinatzer, B. A., and Monteil, C. L.: Ice nucleation active bacteria in precipitation are genetically diverse and nucleate ice by employing different mechanisms, *ISME J.*, 11, 2740–2753, <https://doi.org/10.1038/ismej.2017.124>, 2017.

Jayaweera, K. and Flanagan, P.: Investigations on biogenic ice nuclei in the Arctic atmosphere, *Geophys. Res. Lett.*, 9, 94–97, <https://doi.org/10.1029/GL009i001p00094>, 1982.

Kunert, A. T., Pöhlker, M. L., Tang, K., Krevert, C. S., Wieder, C., Speth, K. R., Hanson, L. E., Morris, C. E., Schmale Iii, D. G., Pöschl, U., and Fröhlich-Nowoisky, J.: Macromolecular fungal ice nuclei in *Fusarium*: effects of physical and chemical processing, *Biogeosciences*, 16, 4647–4659, <https://doi.org/10.5194/bg-16-4647-2019>, 2019.

Melchum, A., Córdoba, F., Salinas, E., Martínez, L., Campos, G., Rosas, I., Garcia-Mendoza, E., Olivos-Ortiz, A., Raga, G. B., Pizano, B., Silva, Ma. M., and Ladino, L. A.: Maritime and continental microorganisms collected in Mexico: An investigation of their ice-nucleating abilities, *Atmospheric Res.*, 293, 106893, <https://doi.org/10.1016/j.atmosres.2023.106893>, 2023.

Mortazavi, R., Attiya, S., and Ariya, P. A.: Arctic microbial and next-generation sequencing approach for bacteria in snow and frost flowers: selected identification, abundance and freezing nucleation, *Atmospheric Chem. Phys.*, 15, 6183–6204, <https://doi.org/10.5194/acp-15-6183-2015>, 2015.

Obata, H., Muryoi, N., Kawahara, H., Yamade, K., and Nishikawa, J.: Identification of a Novel Ice-Nucleating Bacterium of Antarctic Origin and its Ice Nucleation Properties, *Cryobiology*, 38, 131–139, <https://doi.org/10.1006/cryo.1999.2156>, 1999.

Yakobi-Hancock, J. D., Ladino, L. A., and Abbatt, J. P. D.: Review of Recent Developments and Shortcomings in the Characterization of Potential Atmospheric Ice Nuclei: Focus on the Tropics, *Rev. Cienc.*, 17, 15–34, <https://doi.org/10.25100/rc.v17i3.476>, 2014.
